# Supplementary material
Source: Springer Nature journal article supplement (https://www.springermedizin.de/resource/supplementary/12990_2010_365_MOESM2_ESM.pdf/9613276)

# (A) Ro 25-6981

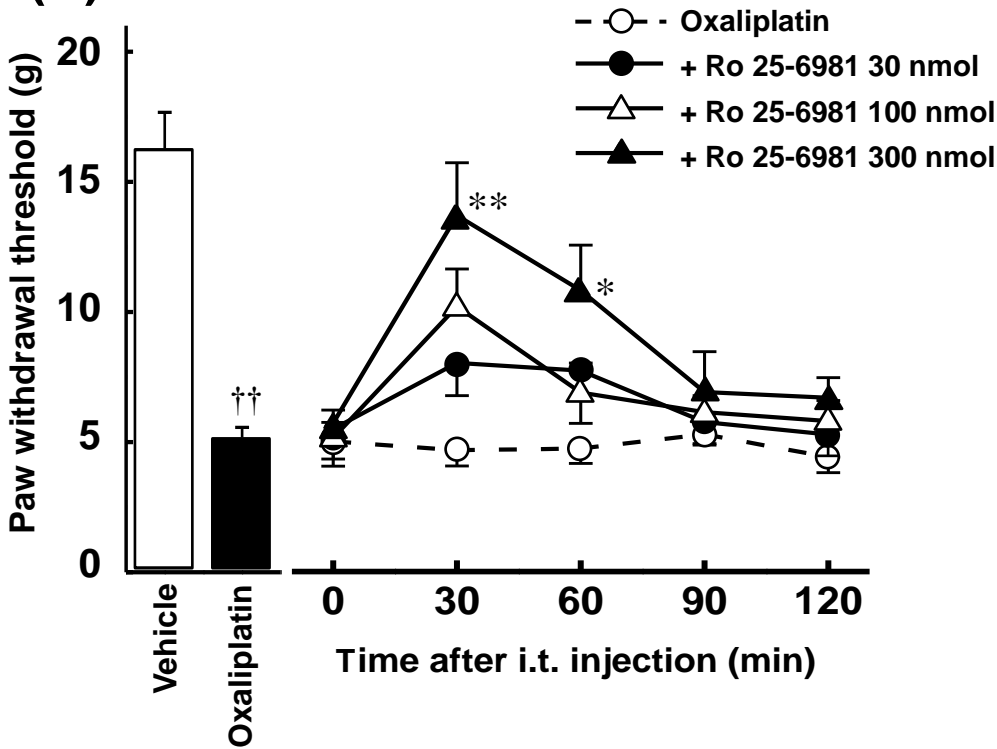

# (B) Ifenprodil

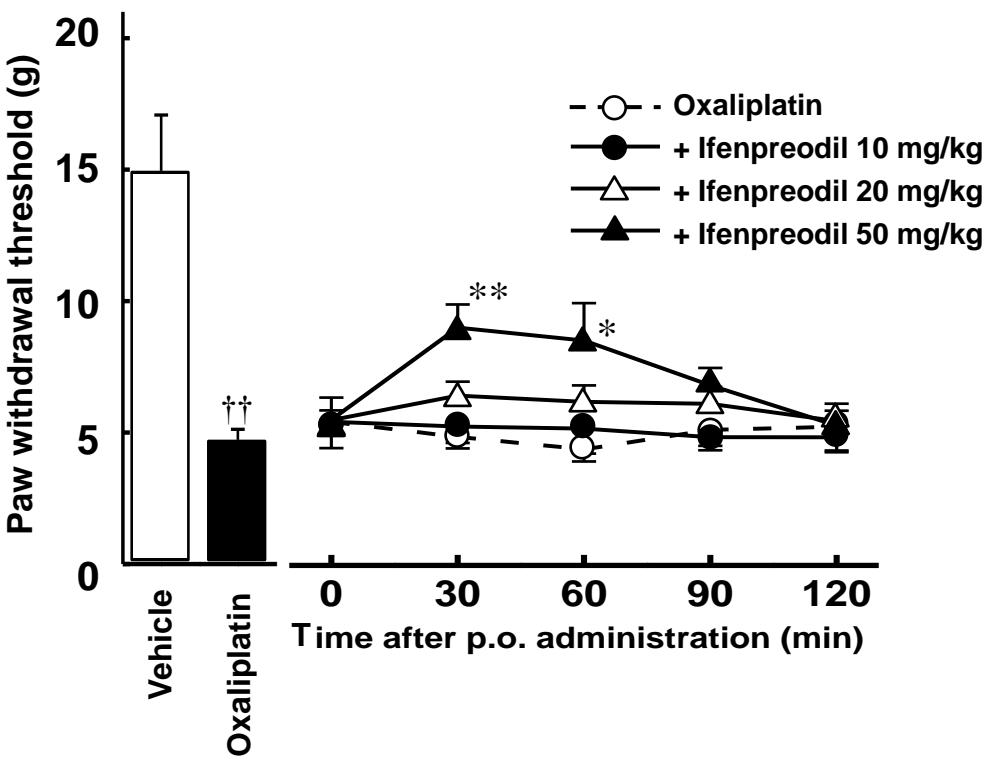

Supplement: MOESM2 [file 9613276]
